# Supplementary material for: Ultrasound-Assisted Extraction of Nannochloropsis oculata with Ethanol and Betaine: 1,2-Propanediol Eutectic Solvent for Antioxidant Pigment-Rich Extracts Retaining Nutritious the Residual Biomass
Source: MDPI journal article supplement (doi:10.3390/antiox11061103), 2022-05-31
Supplement: s1 [file s1]

The chromatogram displays a baseline shift at approximately 23 minutes, indicating a change in the mobile phase or a significant sample component. Two minor peaks are present at approximately 28 and 40 minutes.

The chemical structure shows a complex macrocyclic molecule, possibly a phthalocyanine derivative, with a central ring system containing four nitrogen atoms. The structure is highly substituted with various groups, including a long alkyl chain with a terminal ester group, a methyl group, and a vinyl group. The numbering of the atoms is provided in blue, ranging from 1 to 20 for the main ring and 1' to 20' for the side chains.

Figure S3. Structure of pheophytin a.
